# Supplementary material for: Thermally induced reversible solid-state transformation of novel s-indacene 1,3,5,7-tetraone derivatives
Source: Royal Society of Chemistry journal article supplement (doi:10.1039/c5tc03953c), 2016-01-01

## Supporting information

### Thermal-induced reversible solid-state transformation of novel *s*-indacene 1,3,5,7-tetraone derivatives

Xiaoqin Shen, Yonghao Zheng, Fred Wudl\*

Department of Materials and Center for Energy Efficient Materials, University of California, Santa Barbara, California 93106, USA.

E-mail: [wudl@chem.ucsb.edu](mailto:wudl@chem.ucsb.edu)

### Experimental Section:

#### Preparation of 2,6-di(thiophen-2-yl)-*s*-indacene-1,5-dione-3,7-diol (DTID-diol)

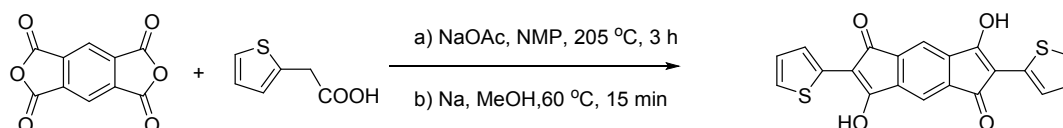

The mixture of pyromellitic anhydride (4.36 g, 20 mmol) and 2-thienyl-acetic acid (7.10 g, 50 mmol), anhydrous sodium acetate (0.82 g, 10 mmol) and 20 ml of 1-methyl-2-pyrrolidone (NMP) was stirred and heated at 205 °C under nitrogen atmosphere for 3 hours. After cooled down to room temperature, the formed solid was filtered off and wash with ethanol and then dried. The solid mixture without further purification was directly used in next step. (3.5g, 46%). MS (FD) *m/z*: 378.00 (*M*<sup>+</sup>).

The dried solid was added into a sodium methoxide solution (methanol (25 ml) with sodium (1.0 g)) and heated to 60 °C with stirring for 15 min. After cooling down to room temperature, 100 ml water was added into the solution. Then the solution was filtered and the

filtrate was acidified by diluted HCl solution. The formed solid was collected and washed with water, dried under vacuum (DTID-diol) (3.0 g). <sup>1</sup>H NMR (DMSO-*d*<sub>6</sub>, 600 MHz): 7.59 (s, 2H), 7.34 (s, 2H), 7.22 (s, 2H), 6.99 (t, *J* = 3.8 Hz, 2H). MS (FD) *m/z*: 378.00 (M<sup>+</sup>) [cal. 378.00].

**Preparation of 2,6-di(thiophen-2-yl)-s-indacene-1,5-dione-3,7-diyl diheptanoate (DTID-Hep<sub>2</sub>) and 3,5-dioxo-2,6-di(thiophen-2-yl)-3,5-dihydro-s-indacene-1,7-diyl diheptanoate (iso-DTID-Hep<sub>2</sub>)**

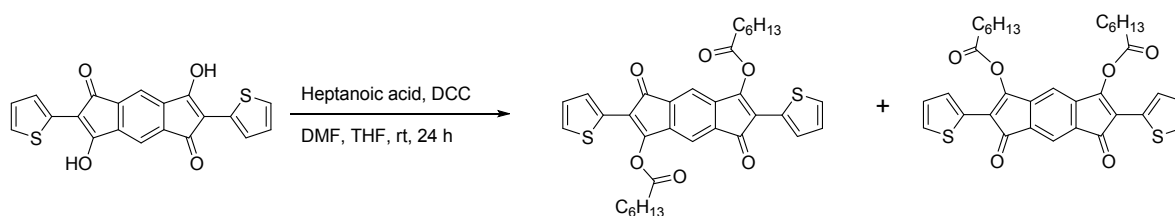

To a solution of 2,6-di(thiophen-2-yl)-s-indacene-1,5-dione-3,7-diol (1.0g, 2.56 mmol) in THF (50 mL), heptanoic acid (0.72g, 5.56 mmol), N,N'-dicyclohexylcarbodiimide (1.2 g, 5.82 mmol) and one drop of DMF was added. The solution was stirred at room temperature for 24 hours and the solid formed was filtered, and the filtrate was dried, followed purification by silica chromatography to afford a dark blue solid (DTID-Hep<sub>2</sub>) (DCM/Hexane:3/7) (0.28 g, 18%). mp: 176-179 °C. <sup>1</sup>H NMR (CDCl<sub>3</sub>, 600MHz): 7.83 (d, *J* = 3.7 Hz, 2H), 7.42 (d, *J* = 5.0 Hz, 2H), 7.11 (t, *J* = 4.4 Hz, 2H), 7.04 (s, 2H), 2.79 (t, *J* = 7.5 Hz, 4H), 2.03 – 1.78 (m, 4H), 1.47 (dd, *J* = 14.6, 6.8 Hz, 4H), 1.43 – 1.32 (m, 8H), 1.01 – 0.88 (m, 6H). <sup>13</sup>C NMR (CDCl<sub>3</sub>, 150MHz): 190.70, 169.27, 159.61, 141.93, 134.53, 129.91, 128.16, 127.59, 127.55, 117.02, 113.65, 34.29, 31.35, 28.76, 24.56, 22.45, 14.00. MS (FD) *m/z*: 602.15 (M<sup>+</sup>) [cal. 602.18].

An isomer of the product with two ester side chains syn to each other (dark brown solid) was also obtained (iso-DTID-Hep<sub>2</sub>) (0.29 g, 19%), mp: 195-197 °C. <sup>1</sup>H NMR (CDCl<sub>3</sub>, 600MHz): 7.88 (d, *J* = 3.7 Hz, 2H), 7.58 (s, 1H), 7.45 (d, *J* = 5.1 Hz, 2H), 7.12 (t, *J* = 4.4 Hz,

2H), 6.50 (s, 1H), 2.78 (t,  $J = 7.5$  Hz, 4H), 1.95 – 1.78 (m, 4H), 1.47 (dd,  $J = 14.5, 6.7$  Hz, 4H), 1.42-1.32 (m, 8H), 0.99 – 0.87 (m, 6H).  $^{13}\text{C}$  NMR ( $\text{CDCl}_3$ , 150MHz): 189.80, 169.37, 157.73, 147.22, 129.96, 129.94, 128.89, 128.22, 127.68, 118.68, 116.45, 111.14, 34.32, 31.38, 28.79, 24.68, 22.46, 14.00. MS (FD)  $m/z$ : 602.16 ( $\text{M}^+$ ) [cal. 602.18].

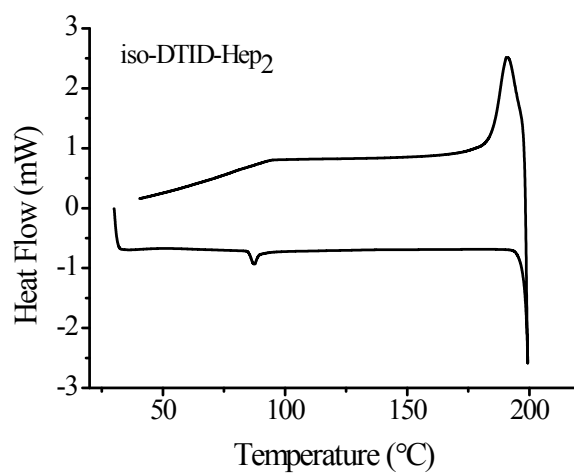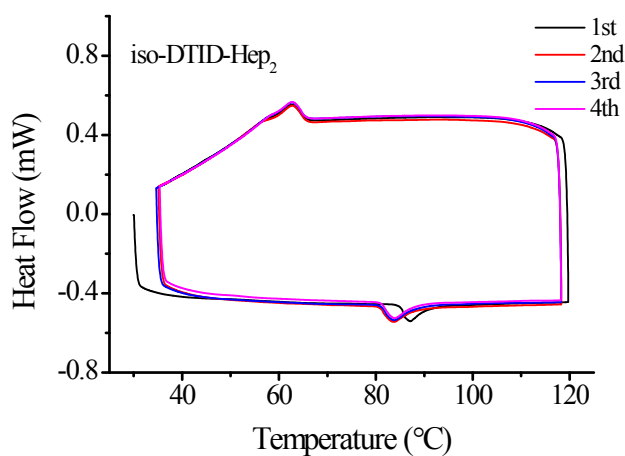

Figure S1. DSC data of iso-DTID-Hep<sub>2</sub>. (a) first cyclic scan, heating from 30 °C to 200 °C. (b) four cyclic scans, heating from 30 °C to 120 °C. Heating and cooling rate: 5 °C/min

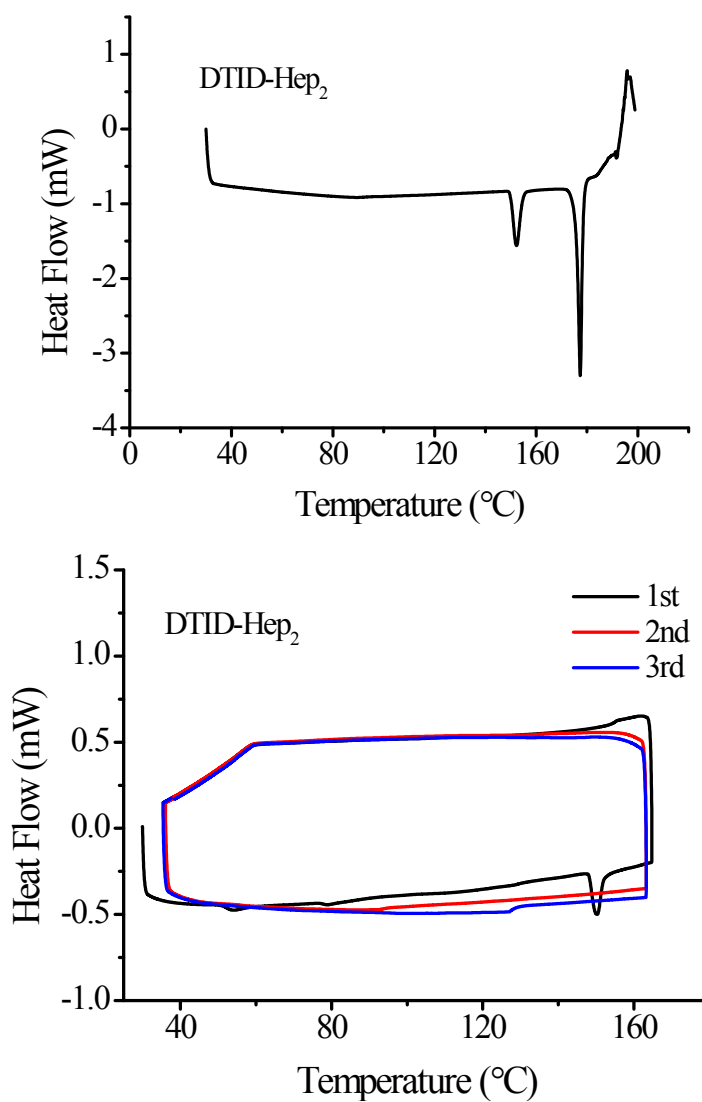

Figure S2. DSC data of DTID-Hep<sub>2</sub>. (a) first cyclic scan, heating from 30 °C to 200 °C. (b) three cyclic scans, heating from 30 °C to 165 °C. Heating and cooling rate: 5 °C/min

Table S1: Single-crystal X-ray diffraction data of DTID-Hep<sub>2</sub> and iso-DTID-Hep<sub>2</sub>

|                               | Space group                       | Cell lengths (Å)                                    | Cell angles (°)                           | Cell volume (Å <sup>3</sup> ) | d <sub>π-π</sub> (Å) | R-factor |
|-------------------------------|-----------------------------------|-----------------------------------------------------|-------------------------------------------|-------------------------------|----------------------|----------|
| DTID-Hep <sub>2</sub> (Form1) | C2/c                              | a = 31.156(5)<br>b = 6.3506(9)<br>c = 18.772(3)     | α = 90.00<br>β = 124.840(11)<br>γ = 90.00 | 3048.44 (Z=4)                 | 3.228                | 8.08%    |
| DTID-Hep <sub>2</sub> (Form2) | P 2 <sub>1</sub> /c               | a = 17.6560(14)<br>b = 5.4631(5)<br>c = 15.1854(12) | α = 90.00<br>β = 91.22<br>γ = 90.00       | 1464.4 (Z=2)                  | --                   | 5.18%    |
| iso-DTID-Hep <sub>2</sub>     | P 2 <sub>1</sub> 2 <sub>1</sub> 2 | a = 20.427 (18)<br>b = 28.01(3)<br>c = 5.260(5)     | α = 90.00<br>β = 90.00<br>γ = 90.00       | 3009.56 (Z = 4)               | 3.401                | 6.86%    |

(a)

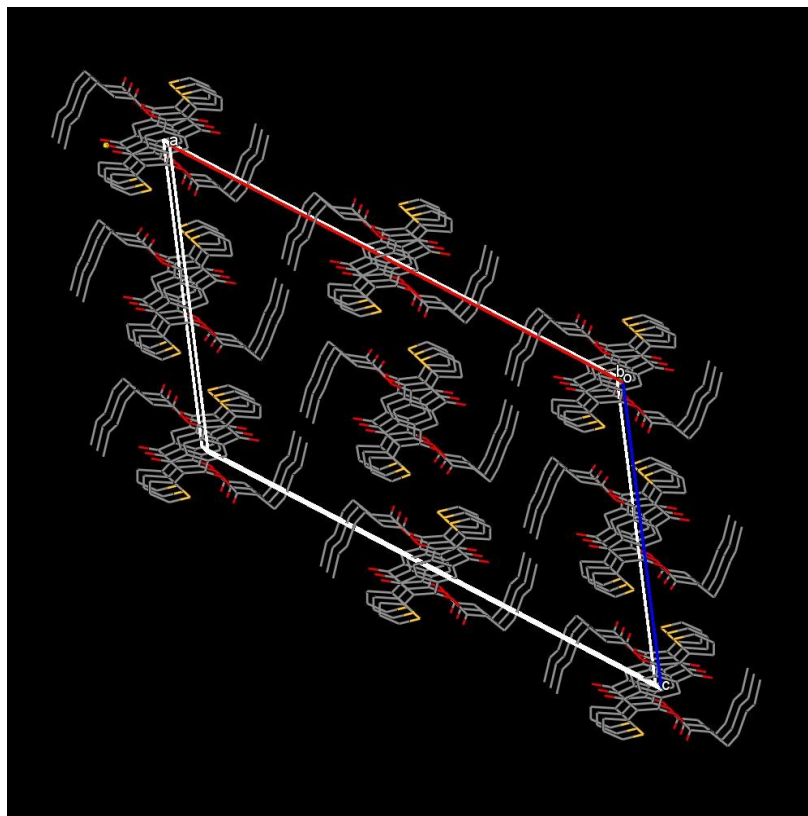

(b)

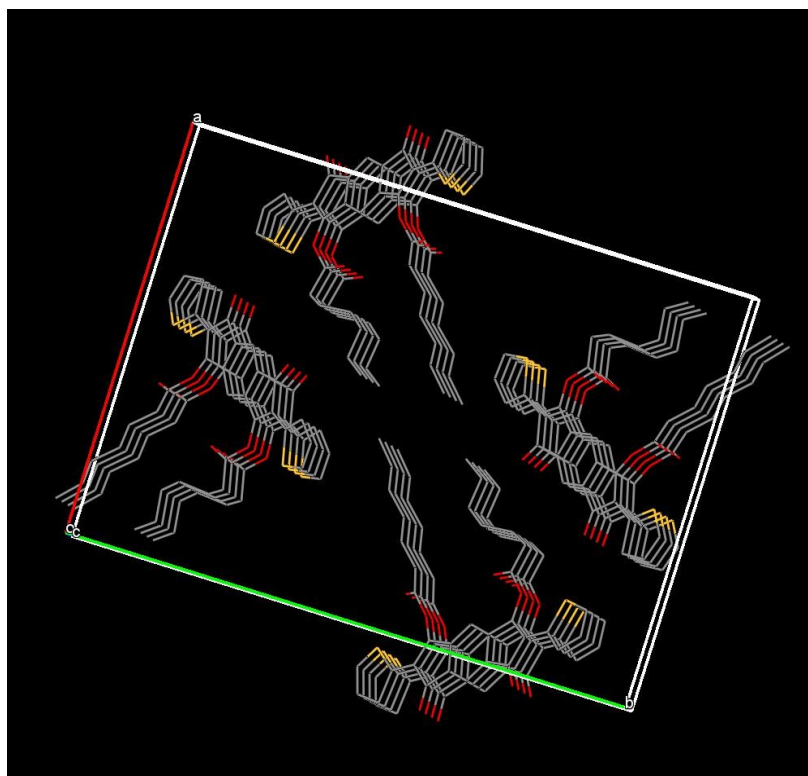

Figure S4. X-ray crystallographic packing of Form 2 of DTID-Hep<sub>2</sub> (a) and iso-DTID-Hep<sub>2</sub>

(b).

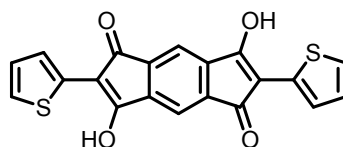

File: H1\_62pul\_r71\_81  
 Pulse Sequence: PROTON (s2pul)  
 Solvent: dmsd  
 Data collected on: Jan 17 2014  
 Temp. 25.0 C / 298.1 K  
 Sample #1, Operator: xshen  
 Relax. delay 1.000 sec  
 Pulse 45.0 degrees  
 Acq. time 1.704 sec  
 Width 8615.4 Hz  
 16 repetitions  
 OBSERVE H1: 399.7551908 MHz  
 DATA PROCESSING  
 FT size 32768  
 Total time 0 min 43 sec

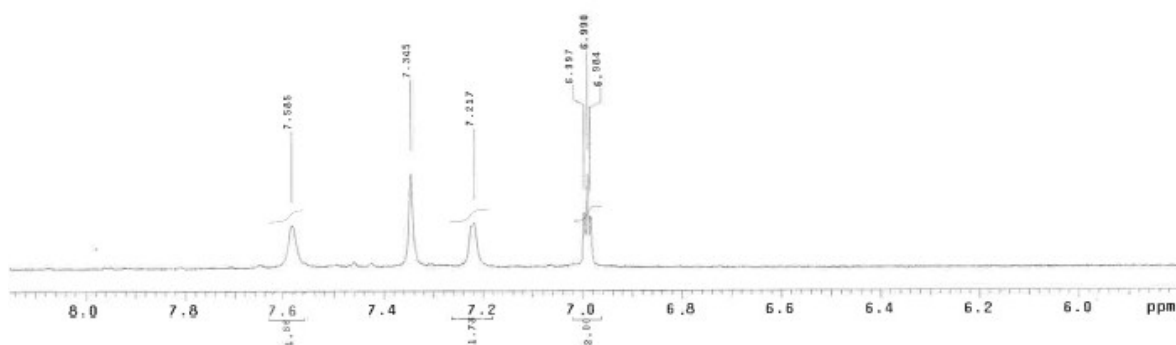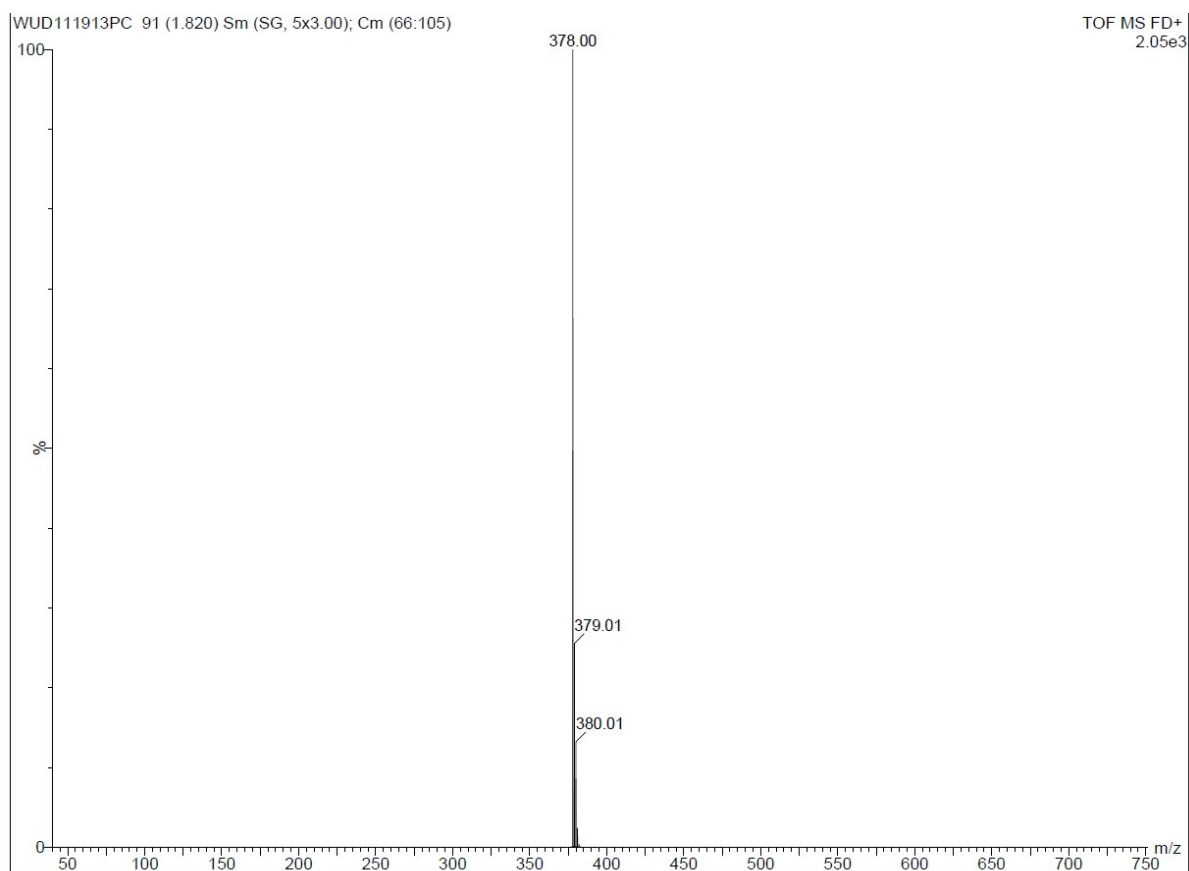

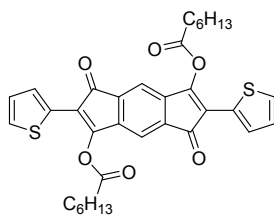

Pulse Sequence: PROTON (s2pul)  
Solvent: cdc13  
Data collected on: Dec 21 2013

Temp. 25.0 C / 298.1 K  
Sample #3, Operator: xshen

Relax. delay 1.000 sec  
Pulse 45.0 degrees  
Acq. time 1.704 sec  
Width 9615.4 Hz  
8 repetitions  
OBSERVE H1, 599.7523420 MHz  
DATA PROCESSING  
FT size 32768  
Total time 0 min 22 sec

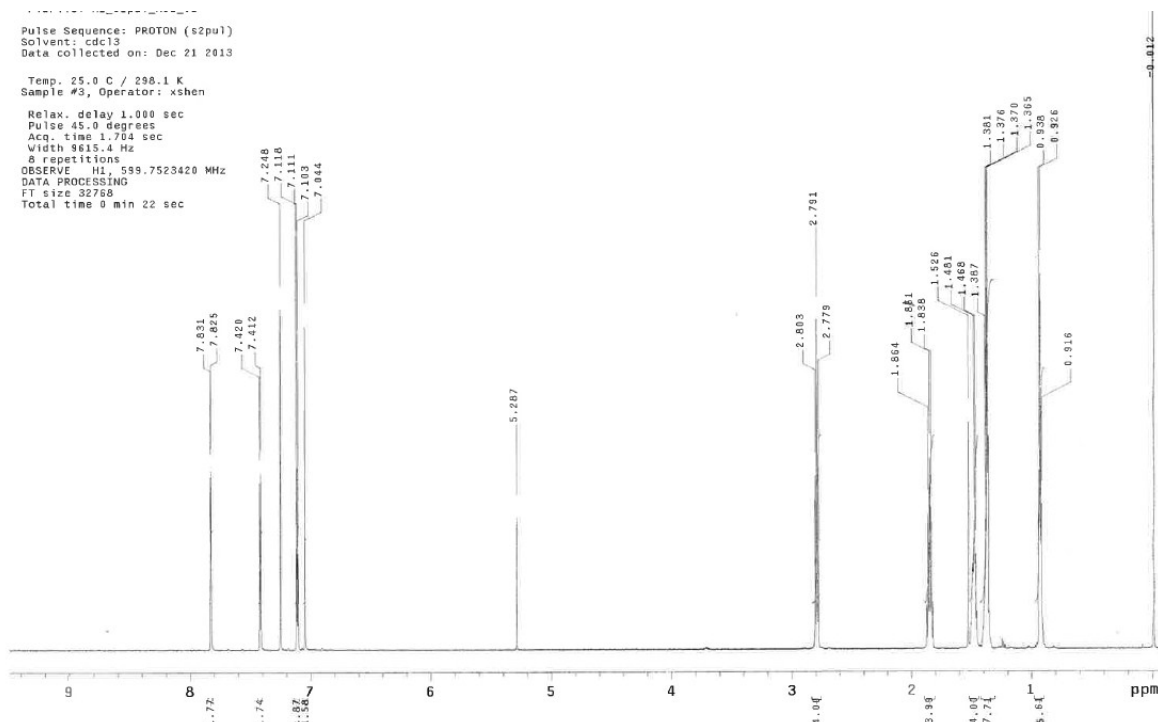

Varian-NMR-vnmrs600  
Archive directory:  
/home/xshen  
Sample directory:  
R51\_20131221\_91  
FidFile: current

Pulse Sequence: CARBON (s2pul)  
Solvent: cdc13  
Data collected on: Dec 21 2013

Temp. 25.0 C / 298.1 K  
Sample #3, Operator: xshen

Relax. delay 1.000 sec  
Pulse 45.0 degrees  
Acq. time 0.855 sec  
Width 37878.8 Hz  
448 repetitions  
OBSERVE C13, 150.8078463 MHz  
DECOUPLE H1, 599.7553407 MHz  
Power 46 dB  
continuously on  
WALTZ-16 modulated  
DATA PROCESSING  
Line broadening 0.5 Hz  
FT size 65536  
Total time 5 hr, 10 min

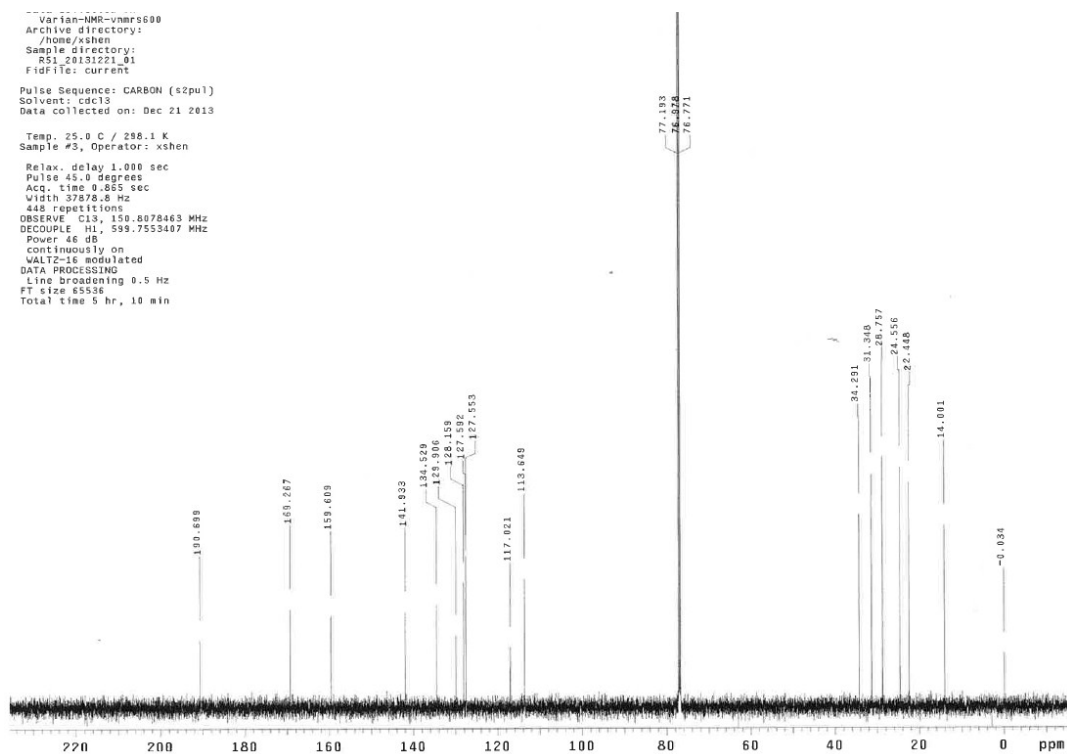



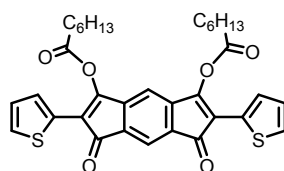

Archive directory: /home/xshen  
 Sample directory: r51-2\_20140117\_01  
 Fidfile: H1\_s2pul\_r51-2\_01  
 Pulse Sequence: PROTON (s2pul)  
 Solvent: cdcl3  
 Data collected on: Jan 17 2014  
 Temp. 25.0 C / 298.1 K  
 Sample #2, Operator: xshen  
 Relax. delay 1.000 sec  
 Pulse 45.0 degrees  
 Acq. time 1.704 sec  
 Width 9615.4 Hz  
 8 repetitions  
 OBSERVE H1, 599.7523420 MHz  
 DATA PROCESSING  
 FT size 32768  
 Total time 0 min 22 sec

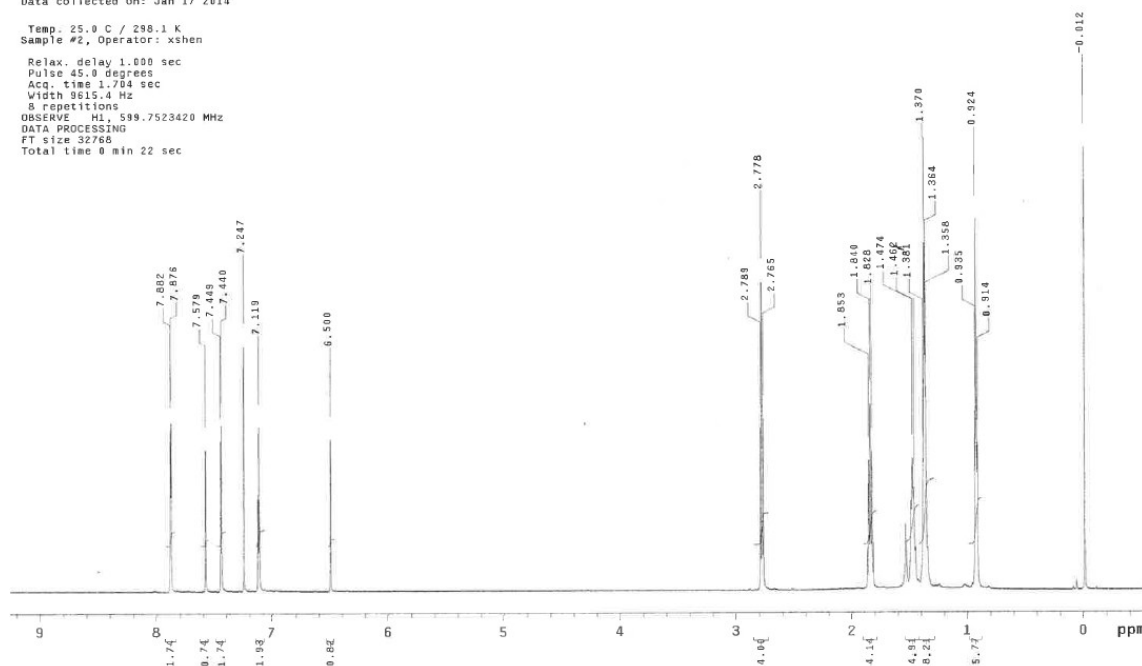

Fidfile: C13\_s2pul\_r51-2\_01  
 Pulse Sequence: CARBON (s2pul)  
 Solvent: cdcl3  
 Data collected on: Jan 17 2014

Temp. 25.0 C / 298.1 K  
 Sample #2, Operator: xshen  
 Relax. delay 1.000 sec  
 Pulse 45.0 degrees  
 Acq. time 0.865 sec  
 Width 37876.8 Hz  
 384 repetitions  
 OBSERVE C13, 150.8078463 MHz  
 DECOUPLE H1, 599.7553407 MHz  
 Power 46 dB  
 continuously on  
 WALTZ-16 modulated  
 DATA PROCESSING  
 Line broadening 0.5 Hz  
 FT size 65536  
 Total time 10 hr, 21 min

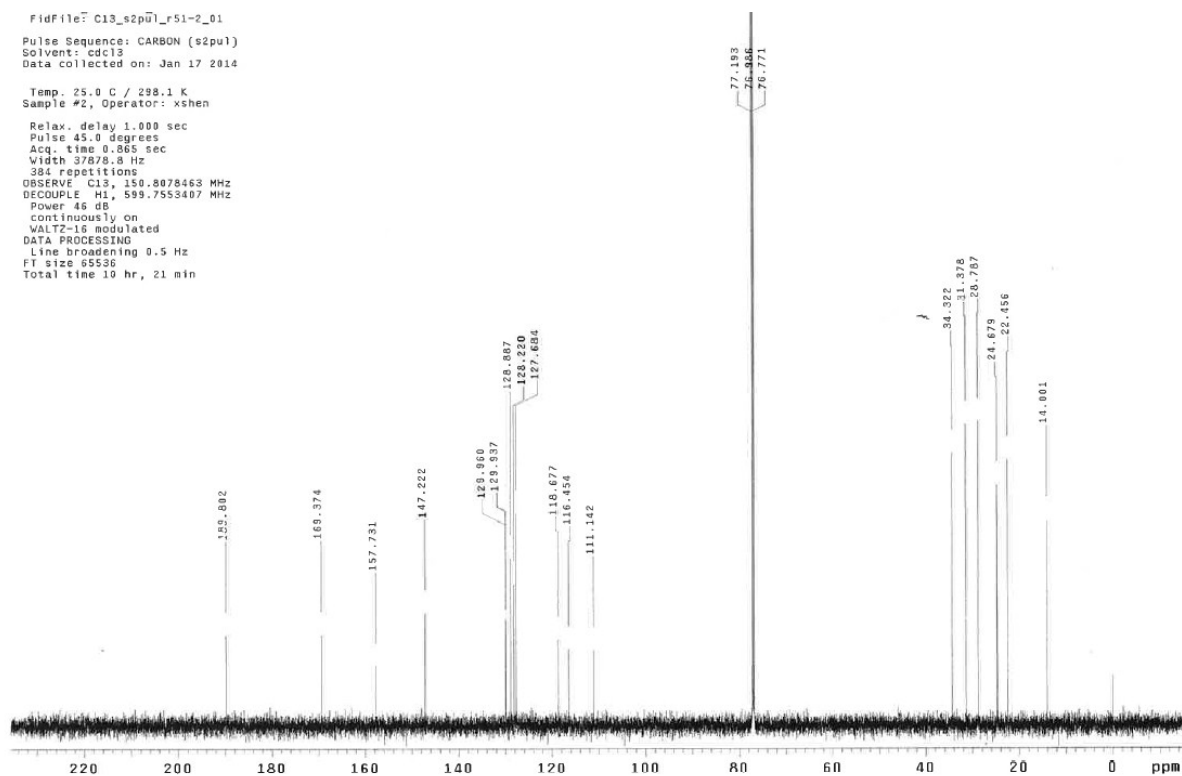

Supplement: c5tc03953c1.pdf [file c5tc03953c1.pdf]
